# Supplementary material for: Changing clinical manifestations of Gaucher disease in Taiwan
Source: Springer Nature journal article supplement (doi:10.1186/s13023-023-02895-z), 2023-09-15
Supplement: MOESM2 [file 26048204]

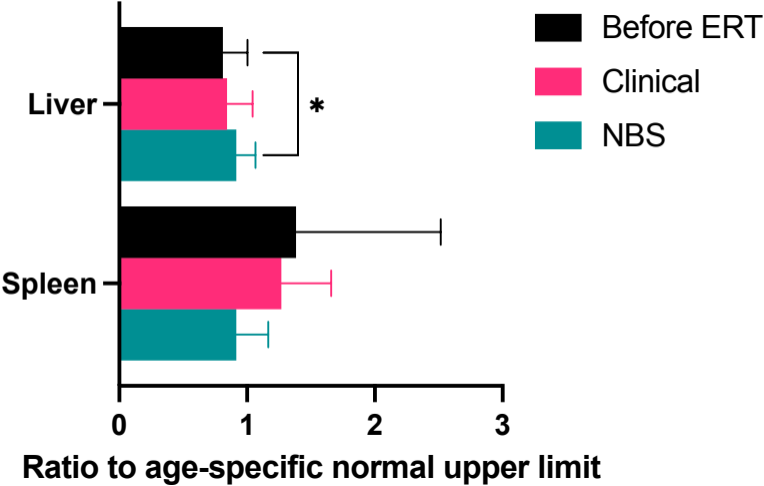

Before ERT

Clinical

NBS

Liver

\*

Spleen

0

1

2

3

Ratio to age-specific normal upper limit
