# Supplementary material for: Changing clinical manifestations of Gaucher disease in Taiwan
Source: Springer Nature journal article supplement (doi:10.1186/s13023-023-02895-z), 2023-09-15

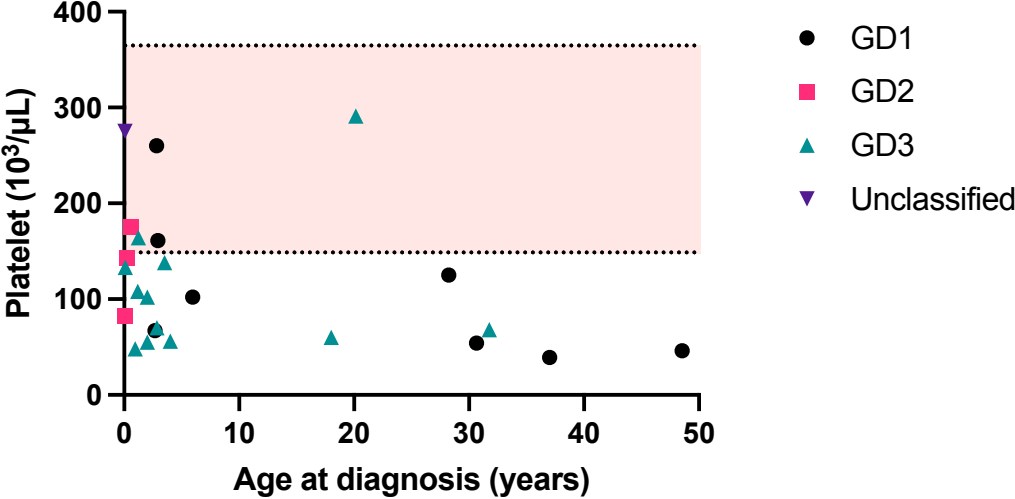

Supplement: MOESM6 [file 26048204]
